# Supplementary material for: Metal complexes of tripodal ligands as ionophores for alkali metal ions
Source: Royal Society of Chemistry journal article supplement (doi:10.1039/c2nj40171a), 2012-01-01
Supplement: c2nj40171a.pdf [file c2nj40171a.pdf]

## Electronic Supplementary Information for

# Metal complexes of tripodal ligands as ionophores for alkali metal ions

Shoichi Katsuta,\* Yuichi Shimizu, Ryota Takahashi, Naoki Kanaya, Takahiro Imoto and Yasuyuki Takeda

*Department of Chemistry, Graduate School of Science, Chiba University, 1-33 Yayoi-cho, Inage, Chiba 263-8522, Japan*

### Table of Contents

#### ESI 1: Summary of the results of DFT calculations (Cartesian coordinates and natural charges)

|                                                                      |            |
|----------------------------------------------------------------------|------------|
| <b>Co•1</b> .....                                                    | <b>S2</b>  |
| <b>Co•2</b> .....                                                    | <b>S3</b>  |
| <b>Al•2</b> .....                                                    | <b>S4</b>  |
| <b>Na(Co•2)<sup>+</sup></b> .....                                    | <b>S5</b>  |
| <b>K(Co•2)<sup>+</sup></b> .....                                     | <b>S6</b>  |
| <b>Rb(Co•2)<sup>+</sup></b> .....                                    | <b>S7</b>  |
| <b>Cs(Co•2)<sup>+</sup></b> .....                                    | <b>S8</b>  |
| <b>Na(Al•2)<sup>+</sup></b> .....                                    | <b>S9</b>  |
| <b>K(Al•2)<sup>+</sup></b> .....                                     | <b>S10</b> |
| <b>Rb(Al•2)<sup>+</sup></b> .....                                    | <b>S11</b> |
| <b>Cs(Al•2)<sup>+</sup></b> .....                                    | <b>S12</b> |
| <b>ESI 2: Characterization of 1, 2, and their complexes</b><br>..... | <b>S13</b> |

## ESI 1: Summary of the results of DFT calculations (Cartesian coordinates and natural charges)

### Co•1 complex

| Atom | No. | X         | Y         | Z         | Natural Charge |
|------|-----|-----------|-----------|-----------|----------------|
| C    | 1   | -0.017258 | 0.001903  | 3.360931  | -0.08318       |
| C    | 2   | -0.024879 | 0.003818  | 4.896105  | -0.67109       |
| C    | 3   | -0.97021  | -1.102814 | 2.832804  | -0.25946       |
| C    | 4   | -0.493262 | 1.381079  | 2.832971  | -0.25948       |
| C    | 5   | 1.419224  | -0.273955 | 2.844026  | -0.25954       |
| H    | 6   | -0.468545 | -2.078413 | 2.895459  | 0.24443        |
| H    | 7   | -1.866439 | -1.148461 | 3.46673   | 0.22815        |
| N    | 8   | -1.353809 | -0.827308 | 1.451125  | -0.48492       |
| H    | 9   | -1.589406 | 1.435048  | 2.889019  | 0.24438        |
| H    | 10  | -0.088435 | 2.178041  | 3.471854  | 0.22815        |
| N    | 11  | -0.053018 | 1.579187  | 1.454717  | -0.48497       |
| H    | 12  | 2.014177  | 0.647819  | 2.906812  | 0.24441        |
| H    | 13  | 1.901968  | -1.024838 | 3.484622  | 0.2282         |
| N    | 14  | 1.381463  | -0.750449 | 1.464325  | -0.48488       |
| C    | 15  | 2.211402  | -1.666286 | 1.071864  | 0.16223        |
| H    | 16  | 2.987131  | -1.980019 | 1.779943  | 0.20445        |
| C    | 17  | 2.191339  | -2.345676 | -0.18317  | -0.22192       |
| C    | 18  | -2.56022  | -1.083297 | 1.050274  | 0.16207        |
| H    | 19  | -3.225767 | -1.598436 | 1.752578  | 0.20443        |
| C    | 20  | -3.129574 | -0.720949 | -0.207211 | -0.22212       |
| C    | 21  | 0.33088   | 2.75299   | 1.059272  | 0.16212        |
| H    | 22  | 0.21156   | 3.585464  | 1.762365  | 0.20445        |
| C    | 23  | 0.940283  | 3.067512  | -0.192434 | -0.22206       |
| C    | 24  | -2.470016 | 0.215272  | -1.076043 | 0.44293        |
| C    | 25  | -4.420014 | -1.207365 | -0.535692 | -0.18233       |
| C    | 26  | -5.06412  | -0.81932  | -1.691153 | -0.2906        |
| C    | 27  | -3.173667 | 0.612711  | -2.25136  | -0.2932        |
| C    | 28  | -4.422013 | 0.104174  | -2.5469   | -0.19637       |
| H    | 29  | -4.8985   | -1.90635  | 0.148511  | 0.22599        |
| H    | 30  | -6.046964 | -1.20854  | -1.937794 | 0.23387        |
| O    | 31  | -1.31781  | 0.753155  | -0.830225 | -0.63981       |
| H    | 32  | -2.680524 | 1.323439  | -2.907053 | 0.24574        |
| H    | 33  | -4.92153  | 0.422305  | -3.459439 | 0.2344         |
| C    | 34  | 1.430222  | 2.030254  | -1.058806 | 0.44292        |
| C    | 35  | 1.166069  | 4.429089  | -0.51636  | -0.18235       |
| C    | 36  | 1.835397  | 4.795624  | -1.664477 | -0.29058       |
| C    | 37  | 2.137302  | 2.443766  | -2.226465 | -0.29321       |
| C    | 38  | 2.323485  | 3.779854  | -2.517319 | -0.19637       |
| H    | 39  | 0.79271   | 5.191307  | 0.165736  | 0.22602        |
| H    | 40  | 1.991644  | 5.84201   | -1.907338 | 0.23388        |
| O    | 41  | 1.319457  | 0.762751  | -0.816156 | -0.6399        |
| H    | 42  | 2.513418  | 1.662889  | -2.879932 | 0.24576        |
| H    | 43  | 2.857709  | 4.055562  | -3.423983 | 0.23441        |
| C    | 44  | 1.055456  | -2.249764 | -1.058925 | 0.44281        |
| C    | 45  | 3.262668  | -3.217458 | -0.502482 | -0.18233       |
| C    | 46  | 3.258593  | -3.972341 | -1.656056 | -0.2906        |
| C    | 47  | 1.073419  | -3.060623 | -2.232117 | -0.29313       |
| C    | 48  | 2.142832  | -3.884379 | -2.518954 | -0.19637       |
| H    | 49  | 4.103362  | -3.277291 | 0.186948  | 0.226          |
| H    | 50  | 4.090968  | -4.626563 | -1.895761 | 0.23389        |
| O    | 51  | 0.008758  | -1.524905 | -0.820632 | -0.63985       |
| H    | 52  | 0.215084  | -2.993908 | -2.893234 | 0.24576        |
| H    | 53  | 2.124859  | -4.478518 | -3.430069 | 0.23442        |
| Co   | 54  | -0.002528 | -0.001323 | 0.311976  | 1.0775         |
| H    | 55  | -1.002578 | 0.311301  | 5.285822  | 0.23895        |
| H    | 56  | 0.195232  | -0.994104 | 5.293643  | 0.23897        |
| H    | 57  | 0.726687  | 0.695982  | 5.29411   | 0.23895        |

### Co<sub>2</sub> complex

| Atom | No. | X         | Y         | Z         | Natural Charge |
|------|-----|-----------|-----------|-----------|----------------|
| C    | 1   | -3.932899 | -0.018231 | 0.044045  | -0.08275       |
| C    | 2   | -5.468305 | -0.024528 | 0.06161   | -0.67071       |
| C    | 3   | -3.399695 | -1.437692 | 0.371734  | -0.25918       |
| C    | 4   | -3.42811  | 0.404585  | -1.360144 | -0.2592        |
| C    | 5   | -3.401403 | 0.984646  | 1.101585  | -0.25914       |
| H    | 6   | -3.456102 | -1.606533 | 1.45631   | 0.2433         |
| H    | 7   | -4.036628 | -2.189209 | -0.114995 | 0.2275         |
| N    | 8   | -2.021788 | -1.584495 | -0.087335 | -0.48568       |
| H    | 9   | -3.502288 | -0.451024 | -2.046076 | 0.24324        |
| H    | 10  | -4.071245 | 1.203455  | -1.754544 | 0.22752        |
| N    | 11  | -2.04656  | 0.870114  | -1.288127 | -0.48584       |
| H    | 12  | -3.479213 | 2.007057  | 0.705774  | 0.24336        |
| H    | 13  | -4.025771 | 0.929517  | 2.004108  | 0.22741        |
| N    | 14  | -2.013902 | 0.683265  | 1.439708  | -0.48551       |
| C    | 15  | -1.59801  | 0.825034  | 2.660631  | 0.16294        |
| H    | 16  | -2.295023 | 1.271923  | 3.378859  | 0.20402        |
| C    | 17  | -0.334128 | 0.420057  | 3.183636  | -0.22138       |
| C    | 18  | -1.618813 | -2.715101 | -0.580502 | 0.16302        |
| H    | 19  | -2.317408 | -3.558532 | -0.536565 | 0.20404        |
| C    | 20  | -0.368041 | -2.970441 | -1.217372 | -0.22142       |
| C    | 21  | -1.655201 | 1.859323  | -2.031156 | 0.16304        |
| H    | 22  | -2.367696 | 2.243679  | -2.77003  | 0.20405        |
| C    | 23  | -0.401457 | 2.536045  | -1.959389 | -0.22135       |
| C    | 24  | 0.476673  | -1.885672 | -1.610936 | 0.42528        |
| C    | 25  | -0.037266 | -4.312017 | -1.555927 | -0.2125        |
| C    | 26  | 1.110364  | -4.595873 | -2.253811 | -0.27102       |
| C    | 27  | 1.660179  | -2.222097 | -2.367424 | 0.27623        |
| C    | 28  | 1.96088   | -3.538834 | -2.662487 | -0.3018        |
| H    | 29  | -0.70805  | -5.109795 | -1.243972 | 0.22503        |
| H    | 30  | 1.373681  | -5.619545 | -2.502219 | 0.2322         |
| O    | 31  | 0.229581  | -0.638649 | -1.389195 | -0.62595       |
| O    | 32  | 2.411267  | -1.144831 | -2.732355 | -0.50647       |
| H    | 33  | 2.862415  | -3.778223 | -3.216346 | 0.23373        |
| C    | 34  | 0.463108  | 2.336868  | -0.837705 | 0.42528        |
| C    | 35  | -0.088969 | 3.498668  | -2.959081 | -0.21246       |
| C    | 36  | 1.058678  | 4.247535  | -2.876296 | -0.27105       |
| C    | 37  | 1.644308  | 3.165205  | -0.770158 | 0.27602        |
| C    | 38  | 1.926733  | 4.077993  | -1.769352 | -0.30182       |
| H    | 39  | -0.774267 | 3.624917  | -3.794661 | 0.22503        |
| H    | 40  | 1.307852  | 4.973835  | -3.643979 | 0.2322         |
| O    | 41  | 0.234144  | 1.521524  | 0.135949  | -0.62594       |
| O    | 42  | 2.411357  | 2.950653  | 0.33601   | -0.50652       |
| H    | 43  | 2.826751  | 4.681157  | -1.713977 | 0.23372        |
| C    | 44  | 0.515018  | -0.448551 | 2.428955  | 0.42522        |
| C    | 45  | 0.006952  | 0.800691  | 4.511248  | -0.21252       |
| C    | 46  | 1.168967  | 0.355574  | 5.090988  | -0.27095       |
| C    | 47  | 1.714331  | -0.91759  | 3.083168  | 0.2761         |
| C    | 48  | 2.024285  | -0.512498 | 4.368106  | -0.30192       |
| H    | 49  | -0.66783  | 1.458005  | 5.055655  | 0.22501        |
| H    | 50  | 1.439503  | 0.65422   | 6.099246  | 0.23218        |
| O    | 51  | 0.259485  | -0.881877 | 1.240493  | -0.62619       |
| O    | 52  | 2.468977  | -1.760683 | 2.323529  | -0.50635       |
| H    | 53  | 2.93646   | -0.860464 | 4.841307  | 0.23376        |
| Co   | 54  | -0.887967 | -0.00503  | 0.00835   | 1.07564        |
| H    | 55  | -5.870345 | -0.617644 | -0.768408 | 0.23831        |
| H    | 56  | -5.850782 | -0.453107 | 0.995596  | 0.23831        |
| H    | 57  | -5.86848  | 0.992355  | -0.028924 | 0.23832        |
| C    | 58  | 3.599941  | -1.383544 | -3.456883 | -0.30844       |
| C    | 59  | 3.593239  | 3.710896  | 0.476685  | -0.30845       |
| C    | 60  | 3.673355  | -2.246606 | 2.878182  | -0.3085        |
| H    | 61  | 4.369112  | -1.429682 | 3.117789  | 0.19632        |
| H    | 62  | 3.494169  | -2.838042 | 3.787893  | 0.19428        |
| H    | 63  | 4.119224  | -2.887063 | 2.114699  | 0.22609        |
| H    | 64  | 4.308842  | -1.998512 | -2.883986 | 0.19626        |
| H    | 65  | 3.399552  | -1.876985 | -4.419071 | 0.1943         |
| H    | 66  | 4.042024  | -0.402408 | -3.640888 | 0.22612        |
| H    | 67  | 4.295718  | 3.527605  | -0.349031 | 0.19618        |
| H    | 68  | 3.380832  | 4.788672  | 0.528842  | 0.19437        |
| H    | 69  | 4.048655  | 3.387898  | 1.41488   | 0.22609        |

## Al<sub>2</sub> complex

| Atom | No. | X         | Y         | Z         | Natural Charge |
|------|-----|-----------|-----------|-----------|----------------|
| C    | 1   | -0.235916 | -0.400904 | 3.91433   | -0.08602       |
| C    | 2   | -0.331241 | -0.554072 | 5.440313  | -0.66955       |
| C    | 3   | -1.146742 | 0.77053   | 3.458245  | -0.25433       |
| C    | 4   | 1.23457   | -0.102068 | 3.51886   | -0.25453       |
| C    | 5   | -0.700851 | -1.718031 | 3.236023  | -0.25423       |
| H    | 6   | -2.186854 | 0.420997  | 3.403286  | 0.24351        |
| H    | 7   | -1.109153 | 1.575988  | 4.205202  | 0.22399        |
| N    | 8   | -0.723852 | 1.281675  | 2.15229   | -0.64733       |
| H    | 9   | 1.446136  | 0.962909  | 3.686888  | 0.24342        |
| H    | 10  | 1.912292  | -0.677481 | 4.165238  | 0.22412        |
| N    | 11  | 1.475931  | -0.442616 | 2.114496  | -0.64673       |
| H    | 12  | 0.121365  | -2.44635  | 3.256503  | 0.24358        |
| H    | 13  | -1.536018 | -2.148521 | 3.80634   | 0.22385        |
| N    | 14  | -1.115262 | -1.47357  | 1.852497  | -0.6469        |
| C    | 15  | -2.128122 | -2.144526 | 1.389366  | 0.17141        |
| H    | 16  | -2.569839 | -2.917992 | 2.030657  | 0.19815        |
| C    | 17  | -2.768897 | -1.949646 | 0.124175  | -0.21722       |
| C    | 18  | -0.810587 | 2.561097  | 1.938259  | 0.17152        |
| H    | 19  | -1.268305 | 3.183718  | 2.717701  | 0.19814        |
| C    | 20  | -0.326382 | 3.264242  | 0.78941   | -0.21715       |
| C    | 21  | 2.634396  | -0.938466 | 1.794904  | 0.17168        |
| H    | 22  | 3.400541  | -1.004292 | 2.578073  | 0.19813        |
| C    | 23  | 3.01193   | -1.455062 | 0.514337  | -0.21686       |
| C    | 24  | 0.510054  | 2.606585  | -0.162037 | 0.42758        |
| C    | 25  | -0.612441 | 4.651272  | 0.669867  | -0.21398       |
| C    | 26  | -0.097786 | 5.382579  | -0.373611 | -0.26713       |
| C    | 27  | 1.053171  | 3.408353  | -1.226625 | 0.27655        |
| C    | 28  | 0.741129  | 4.754045  | -1.324425 | -0.29978       |
| H    | 29  | -1.248955 | 5.121531  | 1.416458  | 0.22568        |
| H    | 30  | -0.32113  | 6.44025   | -0.475968 | 0.23302        |
| O    | 31  | 0.835518  | 1.354009  | -0.085584 | -0.80779       |
| O    | 32  | 1.859489  | 2.72554   | -2.085426 | -0.50407       |
| H    | 33  | 1.143785  | 5.346785  | -2.138892 | 0.23423        |
| C    | 34  | 2.028922  | -1.665699 | -0.498708 | 0.42737        |
| C    | 35  | 4.362816  | -1.845901 | 0.309175  | -0.214         |
| C    | 36  | 4.74967   | -2.423956 | -0.87614  | -0.26699       |
| C    | 37  | 2.46296   | -2.298985 | -1.715861 | 0.2766         |
| C    | 38  | 3.790608  | -2.652002 | -1.891402 | -0.29979       |
| H    | 39  | 5.084631  | -1.67496  | 1.105076  | 0.2257         |
| H    | 40  | 5.782371  | -2.715084 | -1.042889 | 0.23302        |
| O    | 41  | 0.776162  | -1.36351  | -0.355461 | -0.8084        |
| O    | 42  | 1.472472  | -2.49324  | -2.629864 | -0.50404       |
| H    | 43  | 4.111238  | -3.11497  | -2.818637 | 0.23423        |
| C    | 44  | -2.455264 | -0.810986 | -0.676836 | 0.42745        |
| C    | 45  | -3.793726 | -2.853542 | -0.266853 | -0.21404       |
| C    | 46  | -4.494364 | -2.652237 | -1.431909 | -0.26707       |
| C    | 47  | -3.22691  | -0.616193 | -1.875932 | 0.27653        |
| C    | 48  | -4.20778  | -1.524443 | -2.237424 | -0.29986       |
| H    | 49  | -4.009768 | -3.708358 | 0.370565  | 0.22574        |
| H    | 50  | -5.271528 | -3.344723 | -1.740982 | 0.23305        |
| O    | 51  | -1.557444 | 0.066844  | -0.355032 | -0.80776       |
| O    | 52  | -2.893633 | 0.500826  | -2.579653 | -0.50406       |
| H    | 53  | -4.77491  | -1.377162 | -3.150407 | 0.23429        |
| Al   | 54  | -0.042527 | -0.080751 | 0.727303  | 2.05008        |
| H    | 55  | 0.126223  | 0.300774  | 5.952814  | 0.23726        |
| H    | 56  | -1.376256 | -0.619419 | 5.766235  | 0.23727        |
| H    | 57  | 0.182691  | -1.461685 | 5.77903   | 0.23727        |
| C    | 58  | 2.407538  | 3.431222  | -3.179831 | -0.30911       |
| C    | 59  | 1.820311  | -3.085901 | -3.864187 | -0.30911       |
| C    | 60  | -3.585457 | 0.753606  | -3.785194 | -0.3091        |
| H    | 61  | -3.439037 | -0.055003 | -4.515552 | 0.19664        |
| H    | 62  | -4.66376  | 0.888589  | -3.616688 | 0.19475        |
| H    | 63  | -3.165493 | 1.679086  | -4.18429  | 0.22615        |
| H    | 64  | 1.623915  | 3.836689  | -3.835774 | 0.19666        |
| H    | 65  | 3.056486  | 4.255812  | -2.85071  | 0.19471        |
| H    | 66  | 3.003332  | 2.705585  | -3.737152 | 0.22615        |
| H    | 67  | 2.553529  | -2.479026 | -4.414473 | 0.1966         |
| H    | 68  | 2.227039  | -4.098808 | -3.730324 | 0.19474        |
| H    | 69  | 0.895229  | -3.143305 | -4.441324 | 0.22613        |

### Na(Co $\cdot$ 2)<sup>+</sup> complex

| Atom | No. | X         | Y         | Z         | Natural Charge |
|------|-----|-----------|-----------|-----------|----------------|
| C    | 1   | -4.097788 | -0.001449 | 0.004467  | -0.08828       |
| C    | 2   | -5.633933 | -0.002396 | 0.00707   | -0.67506       |
| C    | 3   | -3.573591 | -1.419623 | -0.330584 | -0.26309       |
| C    | 4   | -3.575413 | 0.997685  | -1.057185 | -0.26307       |
| C    | 5   | -3.571417 | 0.417411  | 1.399687  | -0.26306       |
| H    | 6   | -3.623907 | -2.056183 | 0.562147  | 0.25277        |
| H    | 7   | -4.208728 | -1.875274 | -1.100676 | 0.2388         |
| N    | 8   | -2.189157 | -1.35861  | -0.808813 | -0.47062       |
| H    | 9   | -3.626803 | 0.542863  | -2.054735 | 0.25284        |
| H    | 10  | -4.210732 | 1.892257  | -1.065936 | 0.2388         |
| N    | 11  | -2.190434 | 1.38109   | -0.767312 | -0.47054       |
| H    | 12  | -3.622917 | 1.508616  | 1.505727  | 0.25285        |
| H    | 13  | -4.204807 | -0.023567 | 2.179668  | 0.23873        |
| N    | 14  | -2.185885 | -0.025135 | 1.58346   | -0.47049       |
| C    | 15  | -1.838448 | -0.53697  | 2.721342  | 0.17143        |
| H    | 16  | -2.58534  | -0.53205  | 3.521527  | 0.21908        |
| C    | 17  | -0.564344 | -1.100396 | 3.0605    | -0.20537       |
| C    | 18  | -1.843342 | -2.091071 | -1.819508 | 0.1715         |
| H    | 19  | -2.590729 | -2.787894 | -2.212093 | 0.21913        |
| C    | 20  | -0.570663 | -2.103574 | -2.479866 | -0.2054        |
| C    | 21  | -1.84483  | 2.622712  | -0.896027 | 0.17148        |
| H    | 22  | -2.593113 | 3.311632  | -1.300625 | 0.21913        |
| C    | 23  | -0.571322 | 3.200541  | -0.579394 | -0.2054        |
| C    | 24  | 0.391633  | -1.092112 | -2.218676 | 0.38784        |
| C    | 25  | -0.292077 | -3.138474 | -3.407018 | -0.19213       |
| C    | 26  | 0.937705  | -3.215581 | -4.024887 | -0.25398       |
| C    | 27  | 1.683343  | -1.248912 | -2.811811 | 0.25122        |
| C    | 28  | 1.938054  | -2.273024 | -3.708817 | -0.27046       |
| H    | 29  | -1.058165 | -3.881579 | -3.612988 | 0.24145        |
| H    | 30  | 1.153508  | -4.00632  | -4.735294 | 0.25111        |
| O    | 31  | 0.171289  | -0.030305 | -1.483865 | -0.70098       |
| O    | 32  | 2.621624  | -0.328104 | -2.380784 | -0.57378       |
| H    | 33  | 2.915285  | -2.367972 | -4.16959  | 0.24744        |
| C    | 34  | 0.393221  | 2.467839  | 0.162322  | 0.3878         |
| C    | 35  | -0.294117 | 4.521216  | -1.01194  | -0.19207       |
| C    | 36  | 0.936151  | 5.095037  | -0.772897 | -0.25401       |
| C    | 37  | 1.684922  | 3.060613  | 0.320681  | 0.25116        |
| C    | 38  | 1.938226  | 4.34983   | -0.117546 | -0.27029       |
| H    | 39  | -1.06177  | 5.071112  | -1.550314 | 0.24141        |
| H    | 40  | 1.150749  | 6.105868  | -1.102558 | 0.25111        |
| O    | 41  | 0.174328  | 1.299783  | 0.713419  | -0.7013        |
| O    | 42  | 2.624782  | 2.227586  | 0.901023  | -0.57385       |
| H    | 43  | 2.915626  | 4.796323  | 0.028848  | 0.24742        |
| C    | 44  | 0.398241  | -1.375811 | 2.053019  | 0.38772        |
| C    | 45  | -0.284397 | -1.385833 | 4.420058  | -0.19211       |
| C    | 46  | 0.947173  | -1.878358 | 4.795067  | -0.25397       |
| C    | 47  | 1.691264  | -1.807793 | 2.484737  | 0.25112        |
| C    | 48  | 1.947375  | -2.07248  | 3.81995   | -0.2704        |
| H    | 49  | -1.05082  | -1.195121 | 5.166851  | 0.24143        |
| H    | 50  | 1.164211  | -2.098052 | 5.83485   | 0.25112        |
| O    | 51  | 0.176796  | -1.268953 | 0.766209  | -0.7014        |
| O    | 52  | 2.629416  | -1.893961 | 1.47168   | -0.57371       |
| H    | 53  | 2.925773  | -2.421806 | 4.131521  | 0.24744        |
| Co   | 54  | -1.034554 | -0.000375 | 0.000437  | 1.08748        |
| H    | 55  | -6.029652 | -0.162572 | -1.002288 | 0.24684        |
| H    | 56  | -6.026704 | -0.79753  | 0.650936  | 0.24682        |
| H    | 57  | -6.028623 | 0.951787  | 0.374242  | 0.24687        |
| C    | 58  | 3.845393  | -0.240304 | -3.110815 | -0.31192       |
| C    | 59  | 3.846296  | 2.817462  | 1.346205  | -0.31187       |
| C    | 60  | 3.852345  | -2.572031 | 1.759257  | -0.31188       |
| H    | 61  | 4.460534  | -2.016167 | 2.48376   | 0.20627        |
| H    | 62  | 3.65587   | -3.579143 | 2.142802  | 0.21999        |
| H    | 63  | 4.389695  | -2.642811 | 0.811886  | 0.22809        |
| H    | 64  | 4.450742  | -1.147643 | -2.992299 | 0.2063         |
| H    | 65  | 3.6506    | -0.066638 | -4.174778 | 0.22004        |
| H    | 66  | 4.384687  | 0.613566  | -2.696843 | 0.22806        |
| H    | 67  | 4.453027  | 3.171903  | 0.503568  | 0.20627        |
| H    | 68  | 3.648238  | 3.649937  | 2.030217  | 0.22002        |
| H    | 69  | 4.386055  | 2.031792  | 1.87787   | 0.22805        |
| Na   | 70  | 2.040901  | 0.001892  | -0.002433 | 0.91603        |

### K(Co•2)<sup>+</sup> complex

| Atom | No. | X         | Y         | Z         | Natural Charge |
|------|-----|-----------|-----------|-----------|----------------|
| C    | 1   | -4.073855 | -0.047733 | -0.016429 | -0.08713       |
| C    | 2   | -5.609501 | -0.064815 | -0.021791 | -0.67513       |
| C    | 3   | -3.527596 | -1.489272 | -0.175134 | -0.2627        |
| C    | 4   | -3.550572 | 0.820254  | -1.189398 | -0.26261       |
| C    | 5   | -3.556728 | 0.544107  | 1.319509  | -0.26264       |
| H    | 6   | -3.564536 | -2.012981 | 0.788378  | 0.25204        |
| H    | 7   | -4.155957 | -2.045467 | -0.881986 | 0.23864        |
| N    | 8   | -2.147892 | -1.453869 | -0.667611 | -0.46947       |
| H    | 9   | -3.577288 | 0.24362   | -2.122505 | 0.25206        |
| H    | 10  | -4.199405 | 1.695499  | -1.318335 | 0.23853        |
| N    | 11  | -2.17953  | 1.260917  | -0.918533 | -0.46951       |
| H    | 12  | -3.608555 | 1.639723  | 1.28857   | 0.25212        |
| H    | 13  | -4.193517 | 0.202767  | 2.145225  | 0.23856        |
| N    | 14  | -2.174313 | 0.119512  | 1.558419  | -0.46935       |
| C    | 15  | -1.831671 | -0.273193 | 2.743863  | 0.16992        |
| H    | 16  | -2.572521 | -0.155741 | 3.541064  | 0.21832        |
| C    | 17  | -0.592211 | -0.875134 | 3.134712  | -0.21118       |
| C    | 18  | -1.790581 | -2.28041  | -1.598358 | 0.17006        |
| H    | 19  | -2.516522 | -3.04608  | -1.889672 | 0.21831        |
| C    | 20  | -0.552491 | -2.295952 | -2.317422 | -0.21114       |
| C    | 21  | -1.851994 | 2.48817   | -1.16998  | 0.16998        |
| H    | 22  | -2.594777 | 3.106261  | -1.684244 | 0.21827        |
| C    | 23  | -0.628324 | 3.147963  | -0.827089 | -0.21106       |
| C    | 24  | 0.362609  | -1.208782 | -2.222175 | 0.38951        |
| C    | 25  | -0.298871 | -3.384619 | -3.190445 | -0.19299       |
| C    | 26  | 0.853849  | -3.431913 | -3.94145  | -0.2584        |
| C    | 27  | 1.567268  | -1.306323 | -2.99714  | 0.24445        |
| C    | 28  | 1.793042  | -2.384976 | -3.836156 | -0.2732        |
| H    | 29  | -1.030131 | -4.186465 | -3.253726 | 0.23982        |
| H    | 30  | 1.050431  | -4.263775 | -4.60927  | 0.24974        |
| O    | 31  | 0.170357  | -0.135344 | -1.504411 | -0.6908        |
| O    | 32  | 2.457248  | -0.266716 | -2.81492  | -0.56547       |
| H    | 33  | 2.70385   | -2.436556 | -4.423016 | 0.24617        |
| C    | 34  | 0.303272  | 2.542791  | 0.06402   | 0.38908        |
| C    | 35  | -0.40854  | 4.455471  | -1.330445 | -0.19292       |
| C    | 36  | 0.726525  | 5.158149  | -0.994405 | -0.25841       |
| C    | 37  | 1.488748  | 3.293055  | 0.36954   | 0.24398        |
| C    | 38  | 1.681215  | 4.565857  | -0.141834 | -0.27296       |
| H    | 39  | -1.151732 | 4.894351  | -1.991283 | 0.2399         |
| H    | 40  | 0.897392  | 6.15817   | -1.378314 | 0.24979        |
| O    | 41  | 0.140914  | 1.378002  | 0.630641  | -0.69192       |
| O    | 42  | 2.397251  | 2.63625   | 1.175455  | -0.56607       |
| H    | 43  | 2.577575  | 5.122807  | 0.109152  | 0.24619        |
| C    | 44  | 0.343702  | -1.321674 | 2.158568  | 0.38874        |
| C    | 45  | -0.35873  | -1.092026 | 4.516787  | -0.19307       |
| C    | 46  | 0.793112  | -1.710229 | 4.948443  | -0.25841       |
| C    | 47  | 1.545789  | -1.936687 | 2.646135  | 0.24391        |
| C    | 48  | 1.751451  | -2.129392 | 4.002303  | -0.2731        |
| H    | 49  | -1.105043 | -0.75781  | 5.233063  | 0.2399         |
| H    | 50  | 0.973891  | -1.876652 | 6.004977  | 0.24978        |
| O    | 51  | 0.172862  | -1.231157 | 0.867488  | -0.69079       |
| O    | 52  | 2.453114  | -2.287178 | 1.66619   | -0.5652        |
| H    | 53  | 2.66045   | -2.607096 | 4.351733  | 0.24623        |
| Co   | 54  | -1.019417 | -0.010638 | -0.005652 | 1.08466        |
| H    | 55  | -5.998249 | -0.322754 | -1.013553 | 0.24639        |
| H    | 56  | -5.998892 | -0.799851 | 0.691923  | 0.24638        |
| H    | 57  | -6.015788 | 0.915523  | 0.252215  | 0.24635        |
| C    | 58  | 3.490203  | -0.109105 | -3.785272 | -0.31332       |
| C    | 59  | 3.407386  | 3.422599  | 1.80397   | -0.31329       |
| C    | 60  | 3.484515  | -3.20442  | 2.024467  | -0.31328       |
| H    | 61  | 4.21904   | -2.748258 | 2.701182  | 0.20263        |
| H    | 62  | 3.064304  | -4.099643 | 2.496768  | 0.21818        |
| H    | 63  | 3.978756  | -3.484806 | 1.092108  | 0.22752        |
| H    | 64  | 4.235103  | -0.913154 | -3.721449 | 0.20274        |
| H    | 65  | 3.074046  | -0.080595 | -4.798742 | 0.2183         |
| H    | 66  | 3.970922  | 0.846129  | -3.564491 | 0.22724        |
| H    | 67  | 4.146043  | 3.791091  | 1.080078  | 0.20286        |
| H    | 68  | 2.966444  | 4.273113  | 2.336237  | 0.21833        |
| H    | 69  | 3.902392  | 2.764249  | 2.520783  | 0.22733        |
| K    | 70  | 2.427985  | 0.041941  | 0.017472  | 0.96263        |

### Rb(Co<sub>2</sub>)<sup>+</sup> complex

| Atom | No. | X         | Y         | Z         | Natural Charge |
|------|-----|-----------|-----------|-----------|----------------|
| C    | 1   | -4.233046 | -0.006826 | 0.004541  | -0.08674       |
| C    | 2   | -5.768311 | -0.009705 | 0.005756  | -0.67494       |
| C    | 3   | -3.69865  | -1.41673  | 0.366413  | -0.26236       |
| C    | 4   | -3.703062 | 0.385749  | -1.39894  | -0.26225       |
| C    | 5   | -3.702139 | 1.012282  | 1.046189  | -0.26231       |
| H    | 6   | -3.729153 | -1.563008 | 1.453423  | 0.25165        |
| H    | 7   | -4.336923 | -2.18241  | -0.091907 | 0.23826        |
| N    | 8   | -2.323899 | -1.57038  | -0.117475 | -0.47013       |
| H    | 9   | -3.733189 | -0.483035 | -2.068262 | 0.25165        |
| H    | 10  | -4.344462 | 1.163517  | -1.831708 | 0.23824        |
| N    | 11  | -2.329494 | 0.884942  | -1.293338 | -0.47011       |
| H    | 12  | -3.737149 | 2.027294  | 0.631144  | 0.2517         |
| H    | 13  | -4.340365 | 0.993558  | 1.938325  | 0.23825        |
| N    | 14  | -2.325869 | 0.674888  | 1.42039   | -0.47006       |
| C    | 15  | -1.984663 | 0.715394  | 2.668871  | 0.16903        |
| H    | 16  | -2.717297 | 1.124289  | 3.371836  | 0.2178         |
| C    | 17  | -0.765381 | 0.244542  | 3.252363  | -0.21337       |
| C    | 18  | -1.982789 | -2.672053 | -0.706343 | 0.16899        |
| H    | 19  | -2.714223 | -3.486339 | -0.69987  | 0.21779        |
| C    | 20  | -0.765745 | -2.940903 | -1.409702 | -0.21343       |
| C    | 21  | -1.992786 | 1.946908  | -1.953305 | 0.169          |
| H    | 22  | -2.727284 | 2.347913  | -2.658915 | 0.21778        |
| C    | 23  | -0.776922 | 2.692705  | -1.837473 | -0.21344       |
| C    | 24  | 0.146126  | -1.890965 | -1.723135 | 0.39119        |
| C    | 25  | -0.546428 | -4.261098 | -1.881117 | -0.19395       |
| C    | 26  | 0.56294   | -4.565426 | -2.636052 | -0.26029       |
| C    | 27  | 1.297817  | -2.248347 | -2.505606 | 0.24326        |
| C    | 28  | 1.488436  | -3.547164 | -2.947187 | -0.27511       |
| H    | 29  | -1.27331  | -5.031523 | -1.636193 | 0.23918        |
| H    | 30  | 0.732774  | -5.574004 | -2.997503 | 0.24905        |
| O    | 31  | -0.00768  | -0.643436 | -1.377032 | -0.68393       |
| O    | 32  | 2.175158  | -1.212506 | -2.750793 | -0.56064       |
| H    | 33  | 2.360993  | -3.795589 | -3.541943 | 0.24533        |
| C    | 34  | 0.139548  | 2.438701  | -0.775632 | 0.39132        |
| C    | 35  | -0.563574 | 3.763463  | -2.743571 | -0.19398       |
| C    | 36  | 0.545407  | 4.570405  | -2.633193 | -0.26025       |
| C    | 37  | 1.290583  | 3.296069  | -0.697462 | 0.24335        |
| C    | 38  | 1.476193  | 4.329541  | -1.600763 | -0.27524       |
| H    | 39  | -1.294298 | 3.937242  | -3.529528 | 0.23916        |
| H    | 40  | 0.711033  | 5.389356  | -3.325021 | 0.24903        |
| O    | 41  | -0.008819 | 1.513193  | 0.13071   | -0.68393       |
| O    | 42  | 2.172518  | 2.989322  | 0.31777   | -0.56054       |
| H    | 43  | 2.348237  | 4.969901  | -1.52136  | 0.24535        |
| C    | 44  | 0.149745  | -0.546819 | 2.498443  | 0.39126        |
| C    | 45  | -0.546874 | 0.495795  | 4.631577  | -0.19391       |
| C    | 46  | 0.56552   | -0.000637 | 5.271521  | -0.26024       |
| C    | 47  | 1.304708  | -1.039858 | 3.198005  | 0.24318        |
| C    | 48  | 1.494771  | -0.773025 | 4.543678  | -0.27509       |
| H    | 49  | -1.276648 | 1.088786  | 5.177176  | 0.23916        |
| H    | 50  | 0.734734  | 0.190207  | 6.325876  | 0.24905        |
| O    | 51  | -0.003228 | -0.870512 | 1.244614  | -0.68403       |
| O    | 52  | 2.185591  | -1.765484 | 2.422919  | -0.56078       |
| H    | 53  | 2.369287  | -1.160559 | 5.055402  | 0.24533        |
| Co   | 54  | -1.17803  | -0.001699 | 0.001403  | 1.08411        |
| H    | 55  | -6.162085 | -0.626483 | -0.810231 | 0.24607        |
| H    | 56  | -6.161633 | -0.409601 | 0.94738   | 0.24607        |
| H    | 57  | -6.165323 | 1.004233  | -0.119366 | 0.2461         |
| C    | 58  | 3.117719  | -1.384873 | -3.805787 | -0.31394       |
| C    | 59  | 3.117459  | 3.988374  | 0.691825  | -0.31397       |
| C    | 60  | 3.131189  | -2.58915  | 3.100035  | -0.31391       |
| H    | 61  | 3.900203  | -1.993937 | 3.610223  | 0.20094        |
| H    | 62  | 2.634297  | -3.238381 | 3.830113  | 0.21779        |
| H    | 63  | 3.603688  | -3.204139 | 2.331223  | 0.22672        |
| H    | 64  | 3.891233  | -2.120234 | -3.547073 | 0.20094        |
| H    | 65  | 2.619049  | -1.696476 | -4.730793 | 0.21777        |
| H    | 66  | 3.585185  | -0.409674 | -3.957553 | 0.22676        |
| H    | 67  | 3.887784  | 4.131285  | -0.077703 | 0.20095        |
| H    | 68  | 2.620129  | 4.945556  | 0.886232  | 0.21775        |
| H    | 69  | 3.5884    | 3.632246  | 1.610481  | 0.22675        |
| Rb   | 70  | 2.489418  | 0.003192  | -0.003973 | 0.9698         |

### Cs(Co•2)<sup>+</sup> complex

| Atom | No. | X         | Y         | Z         | Natural Charge |
|------|-----|-----------|-----------|-----------|----------------|
| C    | 1   | -4.406149 | -0.039539 | -0.015031 | -0.08633       |
| C    | 2   | -5.941397 | -0.054517 | -0.019143 | -0.6748        |
| C    | 3   | -3.884732 | 0.701274  | 1.243629  | -0.26221       |
| C    | 4   | -3.860506 | -1.491068 | -0.006453 | -0.26223       |
| C    | 5   | -3.878214 | 0.687837  | -1.279383 | -0.26214       |
| H    | 6   | -3.925968 | 1.78614   | 1.085158  | 0.25125        |
| H    | 7   | -4.524934 | 0.464374  | 2.102434  | 0.238          |
| N    | 8   | -2.508099 | 0.2884    | 1.52975   | -0.47068       |
| H    | 9   | -3.889821 | -1.89839  | 1.011862  | 0.25133        |
| H    | 10  | -4.492923 | -2.126106 | -0.639103 | 0.23801        |
| N    | 11  | -2.485653 | -1.509001 | -0.512289 | -0.47064       |
| H    | 12  | -3.899823 | 0.008751  | -2.140785 | 0.25126        |
| H    | 13  | -4.526319 | 1.542385  | -1.510449 | 0.238          |
| N    | 14  | -2.510193 | 1.158667  | -1.046978 | -0.47062       |
| C    | 15  | -2.180463 | 2.352712  | -1.424682 | 0.16828        |
| H    | 16  | -2.911367 | 2.903437  | -2.025226 | 0.21735        |
| C    | 17  | -0.985593 | 3.068724  | -1.098044 | -0.21518       |
| C    | 18  | -2.16845  | 0.025544  | 2.751375  | 0.16827        |
| H    | 19  | -2.899821 | 0.258912  | 3.531653  | 0.21735        |
| C    | 20  | -0.961248 | -0.595276 | 3.203021  | -0.21518       |
| C    | 21  | -2.133871 | -2.429391 | -1.352792 | 0.16839        |
| H    | 22  | -2.853275 | -3.232841 | -1.540066 | 0.21733        |
| C    | 23  | -0.925619 | -2.492947 | -2.116844 | -0.21501       |
| C    | 24  | -0.058335 | -1.199258 | 2.278038  | 0.39323        |
| C    | 25  | -0.758607 | -0.711283 | 4.603114  | -0.19528       |
| C    | 26  | 0.31924   | -1.402324 | 5.105545  | -0.26183       |
| C    | 27  | 1.049208  | -1.925062 | 2.841533  | 0.24284        |
| C    | 28  | 1.223512  | -2.015541 | 4.212451  | -0.27817       |
| H    | 29  | -1.476492 | -0.247556 | 5.27509   | 0.23854        |
| H    | 30  | 0.476433  | -1.491605 | 6.17518   | 0.24826        |
| O    | 31  | -0.184374 | -1.16617  | 0.982404  | -0.67872       |
| O    | 32  | 1.899439  | -2.492154 | 1.917693  | -0.55535       |
| H    | 33  | 2.064881  | -2.568887 | 4.615907  | 0.24449        |
| C    | 34  | -0.040302 | -1.376362 | -2.179717 | 0.39333        |
| C    | 35  | -0.703021 | -3.647407 | -2.912081 | -0.19519       |
| C    | 36  | 0.379182  | -3.723787 | -3.757589 | -0.26176       |
| C    | 37  | 1.074331  | -1.489205 | -3.083076 | 0.24283        |
| C    | 38  | 1.268281  | -2.631322 | -3.842016 | -0.27822       |
| H    | 39  | -1.408475 | -4.471907 | -2.845168 | 0.23853        |
| H    | 40  | 0.551688  | -4.605171 | -4.366066 | 0.24822        |
| O    | 41  | -0.189446 | -0.268978 | -1.511355 | -0.67836       |
| O    | 42  | 1.911269  | -0.394898 | -3.110664 | -0.55565       |
| H    | 43  | 2.113572  | -2.694732 | -4.518967 | 0.24444        |
| C    | 44  | -0.088446 | 2.578281  | -0.103244 | 0.39371        |
| C    | 45  | -0.790425 | 4.342124  | -1.693849 | -0.1951        |
| C    | 46  | 0.276302  | 5.13268   | -1.334729 | -0.2619        |
| C    | 47  | 1.008771  | 3.438229  | 0.254738  | 0.24288        |
| C    | 48  | 1.176248  | 4.672964  | -0.349869 | -0.27806       |
| H    | 49  | -1.504403 | 4.685698  | -2.438268 | 0.23855        |
| H    | 50  | 0.428383  | 6.106014  | -1.788953 | 0.24824        |
| O    | 51  | -0.211468 | 1.438344  | 0.513064  | -0.67824       |
| O    | 52  | 1.85854   | 2.927899  | 1.211998  | -0.55566       |
| H    | 53  | 2.009156  | 5.307374  | -0.06575  | 0.24445        |
| Co   | 54  | -1.355011 | -0.010391 | -0.007748 | 1.08312        |
| H    | 55  | -6.332419 | -0.681445 | 0.790447  | 0.24579        |
| H    | 56  | -6.346053 | 0.95525   | 0.114567  | 0.24576        |
| H    | 57  | -6.329629 | -0.448681 | -0.965315 | 0.24578        |
| C    | 58  | 2.780471  | -3.512697 | 2.375167  | -0.31456       |
| C    | 59  | 2.800098  | -0.27579  | -4.216474 | -0.31468       |
| C    | 60  | 2.724425  | 3.843751  | 1.874517  | -0.31454       |
| H    | 61  | 3.516363  | 4.214303  | 1.209325  | 0.19902        |
| H    | 62  | 2.164375  | 4.697006  | 2.274778  | 0.21713        |
| H    | 63  | 3.178154  | 3.290427  | 2.699594  | 0.22629        |
| H    | 64  | 3.57327   | -3.111788 | 3.021546  | 0.19893        |
| H    | 65  | 2.233639  | -4.291168 | 2.920213  | 0.21702        |
| H    | 66  | 3.231995  | -3.947465 | 1.480834  | 0.22648        |
| H    | 67  | 3.60244   | -1.025491 | -4.180508 | 0.1989         |
| H    | 68  | 2.262492  | -0.371837 | -5.167091 | 0.21717        |
| H    | 69  | 3.237966  | 0.722409  | -4.14832  | 0.22643        |
| Cs   | 70  | 2.549902  | 0.023142  | 0.010192  | 0.98111        |



### Na(Al·2)<sup>+</sup> complex

| Atom | No. | X         | Y         | Z         | Natural Charge |
|------|-----|-----------|-----------|-----------|----------------|
| C    | 1   | -4.180409 | -0.01448  | -0.007031 | -0.09279       |
| C    | 2   | -5.718593 | -0.021084 | -0.009407 | -0.67345       |
| C    | 3   | -3.669401 | -1.476418 | -0.002163 | -0.2584        |
| C    | 4   | -3.676599 | 0.716274  | -1.276315 | -0.25835       |
| C    | 5   | -3.680295 | 0.723736  | 1.25906   | -0.25846       |
| H    | 6   | -3.735475 | -1.884109 | 1.01522   | 0.25138        |
| H    | 7   | -4.312379 | -2.091696 | -0.644224 | 0.23726        |
| N    | 8   | -2.27649  | -1.564955 | -0.471286 | -0.65145       |
| H    | 9   | -3.739431 | 0.039329  | -2.138584 | 0.25131        |
| H    | 10  | -4.325849 | 1.575747  | -1.48622  | 0.23717        |
| N    | 11  | -2.286531 | 1.176091  | -1.119808 | -0.65093       |
| H    | 12  | -3.750751 | 1.808275  | 1.102635  | 0.25133        |
| H    | 13  | -4.327076 | 0.472415  | 2.109146  | 0.23722        |
| N    | 14  | -2.287391 | 0.368652  | 1.578192  | -0.65074       |
| C    | 15  | -1.964148 | 0.301433  | 2.836045  | 0.18463        |
| H    | 16  | -2.73554  | 0.541532  | 3.576088  | 0.21451        |
| C    | 17  | -0.676674 | -0.039922 | 3.371736  | -0.20495       |
| C    | 18  | -1.946253 | -2.617427 | -1.16027  | 0.18477        |
| H    | 19  | -2.712804 | -3.383035 | -1.323578 | 0.21455        |
| C    | 20  | -0.656997 | -2.902443 | -1.723785 | -0.20501       |
| C    | 21  | -1.965188 | 2.302947  | -1.684064 | 0.18455        |
| H    | 22  | -2.736094 | 2.82326   | -2.263193 | 0.21446        |
| C    | 23  | -0.680205 | 2.942218  | -1.648764 | -0.20516       |
| C    | 24  | 0.369464  | -1.922186 | -1.716474 | 0.39962        |
| C    | 25  | -0.417524 | -4.183907 | -2.28013  | -0.19231       |
| C    | 26  | 0.827769  | -4.510164 | -2.773312 | -0.25297       |
| C    | 27  | 1.664314  | -2.311109 | -2.169387 | 0.25433        |
| C    | 28  | 1.879783  | -3.572835 | -2.700303 | -0.26877       |
| H    | 29  | -1.225562 | -4.910755 | -2.300058 | 0.24153        |
| H    | 30  | 1.015547  | -5.489399 | -3.200521 | 0.25125        |
| O    | 31  | 0.179939  | -0.687399 | -1.316498 | -0.86453       |
| O    | 32  | 2.643226  | -1.349123 | -1.994778 | -0.5729        |
| H    | 33  | 2.862284  | -3.857709 | -3.06041  | 0.24738        |
| C    | 34  | 0.3506    | 2.450628  | -0.805895 | 0.40017        |
| C    | 35  | -0.449136 | 4.068137  | -2.478246 | -0.1925        |
| C    | 36  | 0.79215   | 4.666684  | -2.514388 | -0.25302       |
| C    | 37  | 1.641612  | 3.045705  | -0.917157 | 0.25458        |
| C    | 38  | 1.848873  | 4.139693  | -1.742042 | -0.26919       |
| H    | 39  | -1.260472 | 4.444575  | -3.096002 | 0.24146        |
| H    | 40  | 0.973477  | 5.529116  | -3.14685  | 0.25118        |
| O    | 41  | 0.169284  | 1.484543  | 0.062105  | -0.8643        |
| O    | 42  | 2.625277  | 2.41757   | -0.17409  | -0.57256       |
| H    | 43  | 2.828255  | 4.600473  | -1.809585 | 0.24733        |
| C    | 44  | 0.354912  | -0.52317  | 2.52511   | 0.39973        |
| C    | 45  | -0.444479 | 0.120797  | 4.760774  | -0.19237       |
| C    | 46  | 0.79824   | -0.141356 | 5.296886  | -0.25296       |
| C    | 47  | 1.646998  | -0.718492 | 3.095521  | 0.25434        |
| C    | 48  | 1.855299  | -0.546101 | 4.454632  | -0.26885       |
| H    | 49  | -1.256318 | 0.466595  | 5.395562  | 0.24152        |
| H    | 50  | 0.980157  | -0.020478 | 6.359422  | 0.25123        |
| O    | 51  | 0.173203  | -0.796265 | 1.25515   | -0.86477       |
| O    | 52  | 2.631262  | -1.048083 | 2.18062   | -0.57299       |
| H    | 53  | 2.835885  | -0.713581 | 4.886399  | 0.24736        |
| Al   | 54  | -1.002026 | -0.004323 | -0.002308 | 2.03725        |
| H    | 55  | -6.109537 | -0.416908 | -0.953652 | 0.24569        |
| H    | 56  | -6.111597 | -0.642876 | 0.803023  | 0.24569        |
| H    | 57  | -6.117399 | 0.991405  | 0.120626  | 0.2457         |
| C    | 58  | 3.893458  | -1.559224 | -2.651984 | -0.31177       |
| C    | 59  | 3.876572  | 3.09203   | -0.040336 | -0.31178       |
| C    | 60  | 3.880248  | -1.507192 | 2.698556  | -0.31179       |
| H    | 61  | 4.412807  | -0.708277 | 3.228984  | 0.20796        |
| H    | 62  | 3.732584  | -2.358946 | 3.37156   | 0.21975        |
| H    | 63  | 4.468895  | -1.825455 | 1.836111  | 0.2257         |
| H    | 64  | 4.43118   | -2.415775 | -2.227307 | 0.20793        |
| H    | 65  | 3.746391  | -1.714659 | -3.726428 | 0.21977        |
| H    | 66  | 4.476707  | -0.650056 | -2.494479 | 0.22571        |
| H    | 67  | 4.403782  | 3.153593  | -1.000284 | 0.20795        |
| H    | 68  | 3.733382  | 4.099907  | 0.364521  | 0.21968        |
| H    | 69  | 4.46768   | 2.500801  | 0.66156   | 0.22555        |
| Na   | 70  | 2.034037  | 0.002761  | 0.005277  | 0.91957        |

### K(Al•2)<sup>+</sup> complex

| Atom | No. | X         | Y         | Z         | Natural Charge |
|------|-----|-----------|-----------|-----------|----------------|
| C    | 1   | -4.146371 | 0.001025  | 0.007231  | -0.09124       |
| C    | 2   | -5.6841   | 0.001692  | 0.012686  | -0.67351       |
| C    | 3   | -3.635292 | -1.461287 | 0.062843  | -0.25717       |
| C    | 4   | -3.637411 | 0.683438  | -1.288445 | -0.2571        |
| C    | 5   | -3.63129  | 0.780953  | 1.24408   | -0.25713       |
| H    | 6   | -3.670831 | -1.827125 | 1.096887  | 0.25078        |
| H    | 7   | -4.293999 | -2.102217 | -0.536546 | 0.23533        |
| N    | 8   | -2.25749  | -1.555642 | -0.444369 | -0.64904       |
| H    | 9   | -3.677202 | -0.029004 | -2.122131 | 0.25077        |
| H    | 10  | -4.294609 | 1.524805  | -1.541452 | 0.23536        |
| N    | 11  | -2.258176 | 1.16738   | -1.119712 | -0.64934       |
| H    | 12  | -3.668516 | 1.859071  | 1.042151  | 0.25065        |
| H    | 13  | -4.28642  | 0.583117  | 2.101759  | 0.23537        |
| N    | 14  | -2.251627 | 0.390036  | 1.575194  | -0.64938       |
| C    | 15  | -1.953665 | 0.26497   | 2.833242  | 0.18114        |
| H    | 16  | -2.723391 | 0.522085  | 3.569535  | 0.21249        |
| C    | 17  | -0.710435 | -0.198769 | 3.380941  | -0.20665       |
| C    | 18  | -1.963796 | -2.583327 | -1.182113 | 0.18126        |
| H    | 19  | -2.735761 | -3.347667 | -1.325563 | 0.21248        |
| C    | 20  | -0.722288 | -2.82951  | -1.859268 | -0.20674       |
| C    | 21  | -1.962838 | 2.319804  | -1.640722 | 0.18122        |
| H    | 22  | -2.735042 | 2.829175  | -2.228067 | 0.21254        |
| C    | 23  | -0.719879 | 3.02701   | -1.515802 | -0.20675       |
| C    | 24  | 0.290906  | -1.832894 | -1.915936 | 0.39814        |
| C    | 25  | -0.552542 | -4.071746 | -2.520324 | -0.19363       |
| C    | 26  | 0.608861  | -4.347676 | -3.2083   | -0.25522       |
| C    | 27  | 1.494127  | -2.160218 | -2.616248 | 0.24991        |
| C    | 28  | 1.638223  | -3.38562  | -3.24882  | -0.27103       |
| H    | 29  | -1.353106 | -4.805769 | -2.474224 | 0.24015        |
| H    | 30  | 0.7428    | -5.296623 | -3.716598 | 0.25005        |
| O    | 31  | 0.16468   | -0.644318 | -1.379277 | -0.85923       |
| O    | 32  | 2.471743  | -1.185549 | -2.583153 | -0.56697       |
| H    | 33  | 2.552808  | -3.618284 | -3.783475 | 0.24597        |
| C    | 34  | 0.296108  | 2.573834  | -0.629    | 0.39807        |
| C    | 35  | -0.552868 | 4.225307  | -2.254364 | -0.19366       |
| C    | 36  | 0.608513  | 4.95877   | -2.148956 | -0.25515       |
| C    | 37  | 1.500553  | 3.342396  | -0.564776 | 0.24999        |
| C    | 38  | 1.641973  | 4.507248  | -1.30359  | -0.27123       |
| H    | 39  | -1.355715 | 4.556144  | -2.908441 | 0.2401         |
| H    | 40  | 0.740427  | 5.876397  | -2.712374 | 0.25           |
| O    | 41  | 0.170547  | 1.513767  | 0.13085   | -0.85906       |
| O    | 42  | 2.482427  | 2.822907  | 0.255382  | -0.56669       |
| H    | 43  | 2.556995  | 5.086308  | -1.23956  | 0.24602        |
| C    | 44  | 0.301803  | -0.74325  | 2.542604  | 0.39839        |
| C    | 45  | -0.538568 | -0.155116 | 4.78713   | -0.19363       |
| C    | 46  | 0.624703  | -0.61264  | 5.366285  | -0.25525       |
| C    | 47  | 1.507749  | -1.184323 | 3.172248  | 0.24983        |
| C    | 48  | 1.654012  | -1.12304  | 4.549864  | -0.27121       |
| H    | 49  | -1.338639 | 0.248733  | 5.402454  | 0.2401         |
| H    | 50  | 0.760925  | -0.580946 | 6.442045  | 0.25           |
| O    | 51  | 0.170658  | -0.870754 | 1.245251  | -0.85914       |
| O    | 52  | 2.485207  | -1.639582 | 2.309424  | -0.56672       |
| H    | 53  | 2.569931  | -1.467991 | 5.016923  | 0.24596        |
| Al   | 54  | -0.956134 | 0.000219  | 0.000515  | 2.03515        |
| H    | 55  | -6.08316  | -0.421635 | -0.916182 | 0.2451         |
| H    | 56  | -6.076839 | -0.591788 | 0.846326  | 0.24513        |
| H    | 57  | -6.077734 | 1.019736  | 0.112438  | 0.24504        |
| C    | 58  | 3.523356  | -1.281032 | -3.542845 | -0.31292       |
| C    | 59  | 3.539843  | 3.699012  | 0.642517  | -0.31306       |
| C    | 60  | 3.544905  | -2.411938 | 2.871879  | -0.31297       |
| H    | 61  | 4.207742  | -1.798152 | 3.494902  | 0.20466        |
| H    | 62  | 3.149384  | -3.241513 | 3.46864   | 0.21873        |
| H    | 63  | 4.111325  | -2.811915 | 2.028176  | 0.22431        |
| H    | 64  | 4.193071  | -2.123834 | -3.329455 | 0.20463        |
| H    | 65  | 3.119272  | -1.384852 | -4.55613  | 0.21874        |
| H    | 66  | 4.085663  | -0.347537 | -3.472082 | 0.22429        |
| H    | 67  | 4.200826  | 3.935073  | -0.201188 | 0.20469        |
| H    | 68  | 3.141928  | 4.628895  | 1.06399   | 0.21871        |
| H    | 69  | 4.109138  | 3.169333  | 1.409326  | 0.22434        |
| K    | 70  | 2.439693  | -0.001371 | -0.006813 | 0.9752         |

### Rb(Al•2)<sup>+</sup> complex

| Atom | No. | X         | Y         | Z         | Natural Charge |
|------|-----|-----------|-----------|-----------|----------------|
| C    | 1   | -4.306601 | -0.023542 | 0.009804  | -0.0902        |
| C    | 2   | -5.843502 | -0.031684 | 0.013472  | -0.67343       |
| C    | 3   | -3.797505 | 0.621006  | -1.307041 | -0.25682       |
| C    | 4   | -3.792749 | 0.796417  | 1.222746  | -0.25685       |
| C    | 5   | -3.782955 | -1.480473 | 0.110285  | -0.25691       |
| H    | 6   | -3.823544 | -0.121284 | -2.114951 | 0.25028        |
| H    | 7   | -4.462634 | 1.445153  | -1.595003 | 0.23467        |
| N    | 8   | -2.426546 | 1.125646  | -1.143315 | -0.64872       |
| H    | 9   | -3.826594 | 1.867649  | 0.98683   | 0.25035        |
| H    | 10  | -4.449816 | 0.628074  | 2.085564  | 0.23466        |
| N    | 11  | -2.415981 | 0.410289  | 1.565678  | -0.64841       |
| H    | 12  | -3.805181 | -1.810555 | 1.156677  | 0.25038        |
| H    | 13  | -4.441024 | -2.148474 | -0.460231 | 0.23467        |
| N    | 14  | -2.410271 | -1.5767   | -0.407081 | -0.64832       |
| C    | 15  | -2.118087 | -2.608518 | -1.138639 | 0.1799         |
| H    | 16  | -2.883333 | -3.38357  | -1.259606 | 0.2117         |
| C    | 17  | -0.893757 | -2.839134 | -1.851652 | -0.20778       |
| C    | 18  | -2.146772 | 2.277382  | -1.672944 | 0.17996        |
| H    | 19  | -2.92016  | 2.763726  | -2.278145 | 0.21171        |
| C    | 20  | -0.927515 | 3.019828  | -1.524214 | -0.20784       |
| C    | 21  | -2.124344 | 0.294111  | 2.825415  | 0.1798         |
| H    | 22  | -2.893312 | 0.56817   | 3.556532  | 0.21168        |
| C    | 23  | -0.895924 | -0.19616  | 3.383072  | -0.20783       |
| C    | 24  | 0.075042  | 2.608363  | -0.601143 | 0.39857        |
| C    | 25  | -0.788673 | 4.225566  | -2.256514 | -0.19494       |
| C    | 26  | 0.32832   | 5.01623   | -2.102325 | -0.256         |
| C    | 27  | 1.226588  | 3.449     | -0.470333 | 0.24952        |
| C    | 28  | 1.33936   | 4.621086  | -1.203413 | -0.27416       |
| H    | 29  | -1.580501 | 4.517754  | -2.9417   | 0.23949        |
| H    | 30  | 0.43857   | 5.939875  | -2.66056  | 0.24932        |
| O    | 31  | -0.019286 | 1.529473  | 0.135646  | -0.85435       |
| O    | 32  | 2.186178  | 2.994065  | 0.410463  | -0.56004       |
| H    | 33  | 2.214077  | 5.252346  | -1.090774 | 0.24522        |
| C    | 34  | 0.103933  | -0.782622 | 2.556515  | 0.39879        |
| C    | 35  | -0.743672 | -0.161944 | 4.792049  | -0.19499       |
| C    | 36  | 0.383374  | -0.680639 | 5.389931  | -0.25614       |
| C    | 37  | 1.265487  | -1.307001 | 3.209399  | 0.24928        |
| C    | 38  | 1.391207  | -1.255023 | 4.589525  | -0.27415       |
| H    | 39  | -1.533098 | 0.28002   | 5.394845  | 0.23948        |
| H    | 40  | 0.503851  | -0.656241 | 6.467776  | 0.24933        |
| O    | 41  | -0.001466 | -0.882034 | 1.254973  | -0.85415       |
| O    | 42  | 2.220451  | -1.837361 | 2.366887  | -0.56037       |
| H    | 43  | 2.274238  | -1.66099  | 5.070679  | 0.24516        |
| C    | 44  | 0.098164  | -1.823338 | -1.956529 | 0.39855        |
| C    | 45  | -0.738412 | -4.077039 | -2.524564 | -0.19497       |
| C    | 46  | 0.384215  | -4.329089 | -3.281515 | -0.25607       |
| C    | 47  | 1.254215  | -2.119042 | -2.747767 | 0.24927        |
| C    | 48  | 1.383759  | -3.34153  | -3.390004 | -0.27431       |
| H    | 49  | -1.522084 | -4.825156 | -2.434815 | 0.2395         |
| H    | 50  | 0.507482  | -5.275287 | -3.79765  | 0.24933        |
| O    | 51  | -0.009827 | -0.646135 | -1.393054 | -0.85432       |
| O    | 52  | 2.201725  | -1.117379 | -2.796829 | -0.56005       |
| H    | 53  | 2.263219  | -3.551539 | -3.989009 | 0.24522        |
| Al   | 54  | -1.113027 | -0.005577 | 0.001134  | 2.03645        |
| H    | 55  | -6.243288 | 0.986089  | 0.088698  | 0.24482        |
| H    | 56  | -6.237862 | -0.479117 | -0.906118 | 0.2448         |
| H    | 57  | -6.233087 | -0.608265 | 0.860304  | 0.24482        |
| C    | 58  | 3.171989  | 3.928939  | 0.841065  | -0.31436       |
| C    | 59  | 3.218163  | -2.670828 | 2.951093  | -0.31439       |
| C    | 60  | 3.189274  | -1.204369 | -3.820716 | -0.31436       |
| H    | 61  | 3.894911  | -2.025495 | -3.638004 | 0.20259        |
| H    | 62  | 2.725247  | -1.339036 | -4.804594 | 0.21817        |
| H    | 63  | 3.730015  | -0.255452 | -3.804615 | 0.22415        |
| H    | 64  | 3.866472  | 4.191733  | 0.032254  | 0.2027         |
| H    | 65  | 2.705717  | 4.842448  | 1.227843  | 0.21815        |
| H    | 66  | 3.725841  | 3.439408  | 1.645242  | 0.22402        |
| H    | 67  | 3.917543  | -2.096583 | 3.573049  | 0.2027         |
| H    | 68  | 2.763896  | -3.463744 | 3.55642   | 0.2182         |
| H    | 69  | 3.764169  | -3.121592 | 2.119337  | 0.22404        |
| Rb   | 70  | 2.495466  | 0.01242   | -0.005638 | 0.98385        |

### Cs(Al•2)<sup>+</sup> complex

| Atom | No. | X         | Y         | Z         | Natural Charge |
|------|-----|-----------|-----------|-----------|----------------|
| C    | 1   | 4.484213  | -0.01279  | -0.014209 | -0.08944       |
| C    | 2   | 6.021027  | -0.015994 | -0.020877 | -0.67337       |
| C    | 3   | 3.962599  | 0.407539  | -1.414492 | -0.25655       |
| C    | 4   | 3.965428  | -1.435629 | 0.325634  | -0.25656       |
| C    | 5   | 3.973457  | 0.992286  | 1.052717  | -0.25653       |
| H    | 6   | 3.986736  | 1.500623  | -1.506962 | 0.25008        |
| H    | 7   | 4.620163  | -0.004006 | -2.190937 | 0.23403        |
| N    | 8   | 2.589649  | -0.07528  | -1.620504 | -0.64726       |
| H    | 9   | 3.983116  | -2.06223  | -0.574989 | 0.24998        |
| H    | 10  | 4.62806   | -1.902607 | 1.065632  | 0.23402        |
| N    | 11  | 2.596349  | -1.371534 | 0.856578  | -0.64662       |
| H    | 12  | 3.99698   | 0.523851  | 2.044706  | 0.24994        |
| H    | 13  | 4.637324  | 1.865698  | 1.084292  | 0.23402        |
| N    | 14  | 2.6029    | 1.42201   | 0.741365  | -0.64692       |
| C    | 15  | 2.324229  | 2.681006  | 0.887264  | 0.17846        |
| H    | 16  | 3.094357  | 3.329418  | 1.320558  | 0.21075        |
| C    | 17  | 1.116005  | 3.347428  | 0.491107  | -0.20828       |
| C    | 18  | 2.30168   | -0.579875 | -2.780896 | 0.17856        |
| H    | 19  | 3.066421  | -0.532322 | -3.564544 | 0.21081        |
| C    | 20  | 1.08887   | -1.253113 | -3.151053 | -0.20826       |
| C    | 21  | 2.3151    | -2.124105 | 1.875583  | 0.17852        |
| H    | 22  | 3.08157   | -2.827477 | 2.220578  | 0.2108         |
| C    | 23  | 1.107754  | -2.105911 | 2.652239  | -0.20813       |
| C    | 24  | 0.106679  | -1.590156 | -2.176196 | 0.39882        |
| C    | 25  | 0.952128  | -1.676101 | -4.497262 | -0.19587       |
| C    | 26  | -0.138303 | -2.41737  | -4.894594 | -0.25722       |
| C    | 27  | -1.008269 | -2.372747 | -2.620623 | 0.24876        |
| C    | 28  | -1.118793 | -2.768185 | -3.945499 | -0.2751        |
| H    | 29  | 1.727185  | -1.409941 | -5.211672 | 0.2389         |
| H    | 30  | -0.24678  | -2.742092 | -5.924014 | 0.24866        |
| O    | 31  | 0.191922  | -1.249241 | -0.914607 | -0.85238       |
| O    | 32  | -1.937646 | -2.677239 | -1.649256 | -0.55695       |
| H    | 33  | -1.968954 | -3.361238 | -4.264867 | 0.24447        |
| C    | 34  | 0.127373  | -1.089885 | 2.464494  | 0.39854        |
| C    | 35  | 0.974887  | -3.061445 | 3.690963  | -0.19584       |
| C    | 36  | -0.110528 | -3.033313 | 4.538204  | -0.25722       |
| C    | 37  | -0.982141 | -1.082116 | 3.370847  | 0.2487         |
| C    | 38  | -1.089557 | -2.03341  | 4.374669  | -0.27499       |
| H    | 39  | 1.749086  | -3.815049 | 3.81189   | 0.23894        |
| H    | 40  | -0.216094 | -3.763533 | 5.333545  | 0.24868        |
| O    | 41  | 0.21026   | -0.165401 | 1.5404    | -0.85262       |
| O    | 42  | -1.911052 | -0.086716 | 3.15537   | -0.55714       |
| H    | 43  | -1.935931 | -2.01285  | 5.052851  | 0.24451        |
| C    | 44  | 0.128874  | 2.679833  | -0.289281 | 0.39862        |
| C    | 45  | 0.98931   | 4.725235  | 0.800073  | -0.19591       |
| C    | 46  | -0.095793 | 5.448737  | 0.35778   | -0.25724       |
| C    | 47  | -0.980077 | 3.465032  | -0.743454 | 0.24883        |
| C    | 48  | -1.080844 | 4.810463  | -0.421642 | -0.27512       |
| H    | 49  | 1.768253  | 5.204074  | 1.388166  | 0.23886        |
| H    | 50  | -0.196583 | 6.503017  | 0.59283   | 0.24863        |
| O    | 51  | 0.204275  | 1.416547  | -0.626947 | -0.8522        |
| O    | 52  | -1.914889 | 2.783918  | -1.492952 | -0.55681       |
| H    | 53  | -1.92694  | 5.390196  | -0.774791 | 0.24446        |
| Al   | 54  | 1.282254  | -0.004219 | -0.003961 | 2.03911        |
| H    | 55  | 6.411141  | -0.816119 | -0.660454 | 0.24447        |
| H    | 56  | 6.416057  | 0.935257  | -0.395769 | 0.24452        |
| H    | 57  | 6.419615  | -0.169536 | 0.988555  | 0.24451        |
| C    | 58  | -2.826639 | -3.759249 | -1.910957 | -0.3144        |
| C    | 59  | -2.787947 | 0.232896  | 4.231727  | -0.31432       |
| C    | 60  | -2.795078 | 3.558864  | -2.301795 | -0.31434       |
| H    | 61  | -3.536011 | 4.100609  | -1.698548 | 0.20086        |
| H    | 62  | -2.238075 | 4.275888  | -2.91622  | 0.21741        |
| H    | 63  | -3.312624 | 2.851246  | -2.953484 | 0.22375        |
| H    | 64  | -3.570155 | -3.502773 | -2.677559 | 0.20093        |
| H    | 65  | -2.277319 | -4.653488 | -2.227944 | 0.21747        |
| H    | 66  | -3.340037 | -3.966712 | -0.969341 | 0.22374        |
| H    | 67  | -3.532245 | -0.556399 | 4.402982  | 0.20087        |
| H    | 68  | -2.228159 | 0.406163  | 5.15828   | 0.21751        |
| H    | 69  | -3.301717 | 1.152782  | 3.943455  | 0.22368        |
| Cs   | 70  | -2.546804 | 0.0069    | 0.008807  | 0.99646        |

## ESI 2: Characterization of 1, 2, and their complexes

Characterization of the compounds were carried out using a JEOL JNM-LA400 or JNM-ECS400 FT-NMR spectrometer, a JEOL JMS-AX500 (FAB) or Thermo Fisher Exactive (ESI) mass spectrometer, and a Perkin-Elmer 2400 elemental analyzer at Chemical Analysis Center, Chiba University.

**1:**  $\delta_{\text{H}}$  (400 MHz;  $\text{CDCl}_3$ ;  $\text{Me}_4\text{Si}$ ): 1.17 (3 H, s,  $\text{CH}_3$ ), 3.65 (6 H, s,  $\text{CH}_2$ ), 6.90 (3 H, t,  $^3J$  7.5, Ar-H), 6.98 (3 H, d,  $^3J$  8.5, Ar-H), 7.27 (3 H, dd,  $^3J$  7.7,  $^4J$  1.5, Ar-H), 7.34 (3 H, td,  $^3J$  7.8,  $^4J$  1.6, Ar-H), 8.39 (3 H, s, N=CH) and 13.37 (3 H, s, OH). Anal. Found: C, 72.61; H, 6.17; N, 9.80. Calc. for  $\text{C}_{26}\text{H}_{27}\text{N}_3\text{O}_3$ : C, 72.71; H, 6.34; N 9.78%.

**2:**  $\delta_{\text{H}}$  (400 MHz;  $\text{CDCl}_3$ ;  $\text{Me}_4\text{Si}$ ): 1.16 (3 H, s,  $\text{CCH}_3$ ), 3.66 (6 H, s,  $\text{CH}_2$ ), 3.93 (9 H, s,  $\text{OCH}_3$ ), 6.83 (3 H, t,  $^3J$  7.9, Ar-H), 6.89 (3 H, dd,  $^3J$  8.0,  $^4J$  1.7, Ar-H), 6.95 (3 H, dd,  $^3J$  7.7,  $^4J$  1.4, Ar-H), 8.39 (3 H, s, N=CH) and 13.96 (3 H, s, OH). Anal. Found: C, 66.92; H, 6.40; N, 8.03. Calc. for  $\text{C}_{29}\text{H}_{33}\text{N}_3\text{O}_6$ : C, 67.04; H, 6.40; N, 8.09%.

**Co•1 complex:**  $\delta_{\text{H}}$  (400 MHz;  $\text{CDCl}_3$ ;  $\text{Me}_4\text{Si}$ ): 1.21 (3 H, s,  $\text{CH}_3$ ), 3.09 (3 H, d,  $^2J$  12.5,  $\text{CH}_2$ ), 3.85 (3 H, d,  $^2J$  12.3,  $\text{CH}_2$ ), 6.44 (3 H, t,  $^3J$  7.4, Ar-H), 7.04 (6 H, d,  $^3J$  8.0, Ar-H), 7.11 (3 H, t,  $^3J$  7.6, Ar-H) and 7.43 (3 H, s, N=CH). MS (FAB+):  $m/z$  486  $[\text{M}+\text{H}]^+$  and 508  $[\text{M}+\text{Na}]^+$ . Anal. Found: C, 62.09; H, 5.13; N, 8.15. Calc. for  $\text{C}_{26}\text{H}_{24}\text{N}_3\text{O}_3\text{Co}\cdot\text{H}_2\text{O}$ : C, 62.03; H, 5.21; N, 8.35%.

**Co•2 complex:**  $\delta_{\text{H}}$  (400 MHz;  $\text{CDCl}_3$ ;  $\text{Me}_4\text{Si}$ ): 1.19 (3 H, s,  $\text{CCH}_3$ ), 3.16 (3 H, d,  $^2J$  12.5,  $\text{CH}_2$ ), 3.49 (9 H, s,  $\text{OCH}_3$ ), 3.85 (3 H, d,  $^2J$  13.6,  $\text{CH}_2$ ), 6.34 (3 H, t,  $^3J$  7.5, Ar-H), 6.74 (6 H, d,  $^3J$  7.9, Ar-H) and 7.43 (3 H, s, N=CH). MS (ESI+):  $m/z$  576  $[\text{M}+\text{H}]^+$  and 598  $[\text{M}+\text{Na}]^+$ . Anal. Found: C, 60.15; H, 5.01; N, 7.25. Calc. for  $\text{C}_{29}\text{H}_{30}\text{N}_3\text{O}_6\text{Co}$ : C, 60.52; H, 5.25; N, 7.30%.

**Al•2 complex:**  $\delta_{\text{H}}$  (400 MHz;  $\text{CDCl}_3$ ;  $\text{Me}_4\text{Si}$ ): 1.16 (3 H, s,  $\text{CCH}_3$ ), 3.32 (3 H, d,  $^2J$  13.4,  $\text{CH}_2$ ), 3.60 (9 H, s,  $\text{OCH}_3$ ), 4.09 (3 H, d,  $^2J$  13.6,  $\text{CH}_2$ ), 6.48 (3 H, t,  $^3J$  7.8, Ar-H), 6.80 (3 H, dd,  $^3J$  7.9,  $^4J$  1.6, Ar-H), 6.90 (3 H, dd,  $^3J$  7.7,  $^4J$  1.6, Ar-H) and 8.06 (3 H, s, N=CH). MS (ESI+):  $m/z$  544  $[\text{M}+\text{H}]^+$  and 566  $[\text{M}+\text{Na}]^+$ . Anal. Found: C, 63.77; H, 5.51; N, 7.64. Calc. for  $\text{C}_{29}\text{H}_{30}\text{N}_3\text{O}_6\text{Al}$ : C, 64.08; H, 5.56; N, 7.73%.
